# Supplementary material
Source: MDPI journal article supplement (https://www.mdpi.com/2073-4441/13/6/862)
Supplement: s1 [file s1]

## Sheet: S1 Recharge rates and mm
AQUIFER	SUBAQUIFER	MM RAINFALL	MM RECHARGE	RECHARGE RATE	SECTOR
AGUILAS		334	11	0.0328867	VII
ADOR		767	269	0.350411	I
ADSUBIA		565	107	0.189075	II
AGRES		601	163	0.270786	IV
ALBABOR		424	30	0.0705976	III
ALBAIDA		644	128	0.2	IV
ALBUERCA		774	257	0.331863	I
ALMAENS		442	28	0.0632567	V
ALMUDAINA-SEGARIA		810	289	0.356451	I
ALQUERIA		456	100	0.218913	II
ALTEA		532	51	0.0957761	II
ARBRE		594	178	0.3	II
ARENAL		390	4	0.0102377	VII
ARGALLET		349	43	0.123094	VII
ASESTER		559	103	0.184126	II
BANYERES		535	55	0.102629	III
BARADELLO		554	25	0.045115	III
BARRANCONES		531	43	0.0808468	III
BATEIG		363	15	0.0412246	VII
BENIALET		611	109	0.178196	II
BENIARBEIG		879	36	0.0409175	I
BENIARDA-POLOP		603	71	0.117726	II
BENICADELL		684	125	0.182726	IV
BENIDORM		566	89	0.157061	II
BENIMANTELL		603	103	0.170661	II
BENIMASOT		696	24	0.0344394	IV
BERNIA		640	207	0.323338	II
BETIES		349	28	0.0800851	VII
BISCOY		492	69	0.140194	III
BOLULLA		804	216	0.268365	II
CARDENES		406	36	0.0886015	VII
CABEZON DEL ORO		498	51	0.102275	V
CABO ROIG		359	38	0.105678	IX
CABRANTA	Biar	510	58	0.113593	IV
CABRANTA	Banyeres	538	58	0.107644	IV
CABRANTA	Alfafara	591	58	0.0980946	IV
CABRANTA	Muro	605	58	0.0958646	IV
CABRERA		331	28	0.0845379	VI
CAMARELL		619	107	0.172607	IV
CAMPO DE CARTAGENA		380	37	0.097288	IX
CANALETA		536	15	0.0279567	V
CANETS		508	83	0.163263	II
CANTALAR		698	72	0.103071	IV
CAPRALA		428	46	0.107308	VII
CARRASCAL-FERRER		774	228	0.29446	II
CARRASQUETA		489	62	0.126778	V
CARRASQUILLA-PEÑA CHICO		423	43	0.101466	VI
CASA TURRIA		461	69	0.149651	III
CASTELLETS		563	88	0.156047	II
CAUDETE-VILLENA		437	50	0.114326	VI
CHICAMO		344	28	0.08	VII
CHINORLET		326	28	0.0856745	VII
CID		364	24	0.0658831	VII
COCENTAINA		595	88	0.147683	IV
COCOLL		820	143	0.17424	I
COLLADO		332	26	0.08	VII
COLMENAR	Santa Pola	324	35	0.107753	VIII
COLMENAR	Elche	344	35	0.101585	VIII
CONEJERA		431	61	0.141504	VI
CREVILLENTE		336	44	0.13	VII
CUATERNARIO DE ALCALA		767	74	0.0963703	I
CUATERNARIO DE LA SAGRA		513	19	0.0369818	III
CUATERNARIO SERPIS		619	29	0.0468241	IV
CUATREDONDETA		671	5	0.0074429	IV
DEPRESION DE BENISA		666	99	0.14858	I
EL ESTRECHO		518	42	0.0809349	IV
EL PUERTO		559	17	0.0303926	IV
ELDA		370	17	0.0459352	VII
ESCUDERS		529	2	0.00377396	II
FACHECA		689	42	0.0609152	IV
FAVANELLA		445	79	0.177155	III
FAVARA		571	93	0.162603	II
FERRUSA		387	89	0.229968	VII
FIGUERETES		619	235	0.379224	II
FLORENT		614	230	0.374229	II
FONTANELLA		515	91	0.176378	VI
FONTCALENT		383	43	0.112021	V
FONTILLES		1091	146	0.133756	I
FRAILE		433	61	0.140728	VII
FUENTE DE LA CARRASCA		456	68	0.15	V
FUENTE DE LA VACA		551	62	0.112372	III
FUENTE DEL LOBO		440	66	0.15	V
GEROMI		556	130	0.233773	II
GUADALEST		630	204	0.32	II
HELADA		584	88	0.150439	II
HORNA		340	41	0.120502	VII
HOYA DE CASTALLA		471	20	0.042411	III
JAVEA		663	106	0.159805	I
JALON		881	114	0.129267	I
JESUS POBRE		720	9	0.0124936	I
JIJONA		476	27	0.0566934	V
JUMILLA-VILLENA		404	20	0.0494219	VI
LALER		473	106	0.223704	VI
LAS PEDRIZAS		440	29	0.0659069	VI
L'AVAIOL		443	44	0.1	IV
LLOCA MALALTA		443	44	0.1	V
LLOCA MALALTA		452	45	0.1	V
LLORCA		629	67	0.11	VI
LO GETA		340	60	0.176372	VII
LOMA CAREOLA		721	100	0.138538	I
LOMA DEL HIGUERAL		417	65	0.155524	VI
LOS ARRENDADORES		518	17	0.0327632	V
LOS CHORROS		700	207	0.295336	II
LOS MANUELES		465	106	0.227649	II
LOS MOLINOS		407	25	0.0613847	VI
MACHELIS		613	313	0.4	II
MADARA		339	28	0.0824776	VII
MADROÑAL		456	32	0.0700402	III
MAIGMO		452	34	0.07519	III
MARGARIDA		717	22	0.0306612	IV
MASETS-ALCOYES		546	31	0.0567237	V
MEDIANA		392	36	0.0917014	V
MEDIODÃA		878	281	0.31976	I
MELA		633	349	0.4	II
MENECHAOR		510	72	0.14116	III
MILLENA		622	11	0.0176773	IV
MILLENA-BENIMASOT		659	8	0.0121246	IV
MOLI VELL		506	76	0.15	II
MOLINET DE ALCALA		743	130	0.174929	I
MONNEGRE		447	23	0.0513684	V
MONTGO-DENIA		725	72	0.0992584	I
MURO DE ALCOY		609	163	0.267311	IV
NOU SARGANELLA		429	64	0.15	VII
NOVELDA		332	9	0.0270319	VII
OLCINA		597	57	0.0953818	IV
OLIVARETA		1046	454	0.4	I
ONIL		440	77	0.17466	III
ONTENIENTE		575	100	0.17	IV
ORBA		1112	322	0.289422	I
ORCHETA		556	13	0.0233556	II
PALOMARET		373	19	0.0509186	VII
PARCENT		895	9	0.01	I
PARTAGAT		599	120	0.2	II
PEÑA MORO		654	47	0.0717803	IV
PEÑON		920	279	0.303251	I
PEÑARRUBIA		417	52	0.124511	VI
PENÃGUILA		589	109	0.184808	III
PENYA COSTA		561	7	0.012	II
PETREL		384	19	0.0493647	VII
PINAR DE CAMÃšS	Onil	426	99	0.231889	III
PINAR DE CAMUS		515	99	0.192015	III
PINAR DE LA UMBRIA		445	137	0.307219	III
PLA DE LA CASA		682	68	0.0996642	IV
PONCE		425	32	0.075121	VII
PUIG-CAMPANA		501	98	0.195518	II
PUNTAL DE LOS CARROS		436	47	0.107698	VI
PUSA		394	12	0.0304471	VII
RACO		513	15	0.0292354	V
RECONCO		470	73	0.155005	III
REGALL		550	81	0.147008	III
RENTONAR		555	33	0.0593716	V
RETOR		591	44	0.0743968	IV
RIOLA		592	35	0.0590552	IV
ROCIN		483	201	0.4	VI
ROCIN		525	201	0.382604	VI
ROMERO		452	22	0.05	V
ROSARIO		442	80	0.180948	VI
RULLO		406	26	0.0640147	VII
SALT DE SAN CRISTOBAL		526	35	0.066428	III
SALTES		755	74	0.0979952	I
SAN JAIME		547	164	0.3	III
SAN JUAN		441	27	0.0611388	V
SAN VICENTE		397	24	0.0603134	V
SANATORIO	Torremanzanas	518	34	0.0655638	V
SANATORIO	Benifallim	554	34	0.0613569	V
SANCHO		323	15	0.046367	VIII
SANET		899	189	0.210012	I
SEGUILLI		948	103	0.108612	I
SELLA		561	51	0.090867	II
SERRAL-SALINAS		331	28	0.0845726	VII
SERRAVALLIENSE DE BENIFALLIM		591	75	0.12	III
SERRELLA-AIXORTA		668	215	0.321486	II
SERRETA LARGA		339	37	0.109092	VII
SIERRA DE CALLOSA		309	53	0.1717	IX
SIERRA DE ORIHUELA		254	42	0.1667	IX
SOLANA		502	73	0.145312	VI
SOLANA DE LA LLOSA		870	257	0.29	I
TABARIES		400	35	0.0872875	VII
TARBENA		792	79	0.0996824	II
TERCIARIO DE COCENTAINA		597	19	0.0317896	IV
TERCIARIO DE LA ALMADRABA		399	33	0.0825815	VII
TERELLA		610	102	0.167	I
TORREMANZANAS		540	15	0.0277772	V
TORRES		574	20	0.034	II
TORREVIEJA		329	7	0.0212672	IX
TOSALET		701	260	0.370417	IV
TOSSAL REO		422	23	0.0543989	V
ULL DE LA FONT		602	84	0.139377	IV
UMBRIA		324	28	0.0862231	VII
VERTICE		448	83	0.185031	III
VALLE SERPIS		650	40	0.0615032	IV
VEGA BAJA		301	28	0.0927276	IX
VEGA DE AGOST		362	13	0.0358213	V
VENTOS-CASTELLAR		411	9	0.021893	V
VERGEL		857	163	0.190076	I
VILLAJOYOSA		566	70	0.123597	II
VOLCADORES		594	25	0.0420813	IV
VOLTES		464	41	0.0883163	III
XORRETS		604	102	0.168751	II
